# Supplementary material
Source: PubMed Central journal article supplement (PMC4070618)
Supplement: NIHMS578304-supplement-03.pdf [file NIHMS578304-supplement-03.pdf]

**Table S2: Characteristics of Immunosuppressive Therapy Studies**

| Study Number           | N  | Urine protein, median (IQR) | Scr, mean (SD) | Events N (%) |                 |        |           |      | Median FU, year |
|------------------------|----|-----------------------------|----------------|--------------|-----------------|--------|-----------|------|-----------------|
|                        |    |                             |                | ESRD         | Doubling of Scr | Deaths | Composite | %    |                 |
| <b>IgA Nephropathy</b> |    |                             |                |              |                 |        |           |      |                 |
| E21-1                  | 34 | 1.0 (0.6, 2.7)              | 1.43 (0.36)    | 2            | 2               | 1      | 3         | 8.8  | 3.2             |
| E21-2                  | 73 | 1.6 (0.7, 3.2)              | 2.17 (0.71)    | 13           | 11              | 0      | 17        | 23.3 | 2.4             |
| E21-3                  | 97 | 2.1 (1.2, 3.5)              | 1.48 (0.48)    | 16           | 4               | 2      | 19        | 19.6 | 2.9             |
| E21-4                  | 29 | 2.3 (1.6, 3.3)              | 2.44 (1.07)    | 7            | 0               | 0      | 7         | 24.1 | 1.5             |
| <b>Lupus</b>           |    |                             |                |              |                 |        |           |      |                 |
| E22-1                  | 83 | 2.5 (1.5, 3.8)              | 1.16 (0.64)    | 5            | 8               | 4      | 12        | 14.5 | 7.5             |
| E22-2                  | 62 | 3.9 (2.6, 7.0)              | 1.28 (0.64)    | 2            | 1               | 0      | 1         | 1.6  | 4.6             |
| E22-3                  | 83 | 4.4 (2.0, 8.2)              | 2.02 (1.24)    | 24           | 13              | 17     | 33        | 39.8 | 2.3             |
| <b>Membranous</b>      |    |                             |                |              |                 |        |           |      |                 |
| E23-1                  | 11 | 4.5 (3.6, 9.0)              | 1.31 (0.57)    | 0            | 2               | 0      | 2         | 18.2 | 2.6             |
| E23-2                  | 76 | 4.8 (3.8, 7.9)              | 1.07 (0.27)    | 10           | 19              | 4      | 19        | 25.0 | 8.4             |
| E23-3                  | 10 | 5.2 (3.6, 6.8)              | 1.38 (0.57)    | 0            | 2               | 0      | 2         | 20.0 | 5.6             |
| E23-4                  | 76 | 5.4 (4.1, 7.8)              | 1.01 (0.28)    | 2            | 10              | 2      | 10        | 13.2 | 2.5             |
| E23-5                  | 91 | 5.5 (4.0, 8.7)              | 1.09 (0.42)    | 2            | 3               | 0      | 3         | 3.3  | 3.4             |
| E23-6                  | 31 | 5.6 (4.0, 8.1)              | 0.95 (0.29)    | 0            | 1               | 0      | 1         | 3.2  | 1.9             |
| E23-7                  | 48 | 7.3 (4.4, 9.7)              | 1.04 (0.23)    | 0            | 4               | 0      | 4         | 8.3  | 1.8             |

N, number; IQR, interquartile range; Scr, serum creatinine; SD, standard deviation; ESRD, end stage renal disease; FU, follow up. Units for urine protein are grams/day. One additional study was included in the description of the pooled dataset in the methods paper, which was removed due to no outcomes.

Note: Each study is referred by an alphanumeric code. Each letter refers to treatment comparisons, and each number refers to the individual studies. **A** is RAS (renin angiotensin system) Blockade vs. Control, **B** is RAS Blockade vs. CCB (calcium channel blocker), **C** is Intensive Blood Pressure **D** is Low protein diet, and **E** is Immunosuppressive therapy. For studies with multiple interventions, there will be multiple letter-number codes for that study. For example, AASK which had multiple interventions: RAS Blockage vs. placebo, RAS Blockade vs. CCB, and Blood pressure control. Its study number is 1, but it has three codes to indicate the specific treatment comparison: A1, B1 and C1.
