# Supplementary material
Source: PubMed Central journal article supplement (PMC4070618)
Supplement: NIHMS578304-supplement-04.pdf [file NIHMS578304-supplement-04.pdf]

**Table S3: Clinical Characteristics by Study or Study Groups**

| Study Number                        | Disease    | N    | Age Mean (SD), years | Female Number (%) | Black Number (%) | Median Urine Protein (25 <sup>th</sup> , 75 <sup>th</sup> percentile) |
|-------------------------------------|------------|------|----------------------|-------------------|------------------|-----------------------------------------------------------------------|
| <b>A. RAS Blockade v control</b>    |            |      |                      |                   |                  |                                                                       |
| A1                                  | HTN        | 877  | 54.6 (10.7)          | 339 (38.7)        | 877 (100)        | 0.12 (0.04, 0.61)                                                     |
| A2                                  | CKD        | 122  | 52.4 (11.6)          | 44.0 (36.1)       | 74.0 (60.7)      | 0.23 (0.10, 0.98)                                                     |
| A3                                  | CKD        | 103  | 50.6 (12.9)          | 35.0 (34.0)       | 1.0 (1.0)        | 0.50 (0.10, 2.50)                                                     |
| A4                                  | CKD        | 562  | 50.9 (12.5)          | 157 (27.9)        | 0.0 (0.0)        | 0.84 (0.13, 2.46)                                                     |
| A5                                  | CKD        | 55   | 49.8 (11.7)          | 28.0 (50.9)       | 0.0 (0.0)        | 1.09 (0.44, 2.60)                                                     |
| A6                                  | CKD        | 106  | 46.7 (13.2)          | 38.0 (35.8)       | 37.0 (34.9)      | 1.25 (0.26, 3.14)                                                     |
| A7                                  | CKD        | 67   | 45.5 (12.8)          | 34.0 (50.7)       | 0.0 (0.0)        | 1.43 (0.75, 2.95)                                                     |
| A8                                  | CKD        | 98   | 51.2 (14.1)          | 47.0 (48.0)       | 0.0 (0.0)        | 1.60 (0.60, 3.20)                                                     |
| A9                                  | IgA        | 109  | 40.5 (9.5)           | 30.0 (27.5)       | 0.0 (0.0)        | 1.60 (1.05, 2.61)                                                     |
| A10                                 | CKD        | 224  | 44.7 (15.4)          | 113 (50.4)        | 0.0 (0.0)        | 1.69 (1.06, 2.24)                                                     |
| A11                                 | IgA        | 44   | 31.6 (11.5)          | 17.0 (38.6)       | 0.0 (0.0)        | 1.70 (1.10, 2.40)                                                     |
| A12                                 | Diabetes   | 409  | 34.5 (7.6)           | 191 (46.7)        | 32.0 (7.8)       | 1.86 (1.01, 3.84)                                                     |
| A13                                 | Diabetes   | 1513 | 60.2 (7.4)           | 956 (63.2)        | 230 (15.2)       | 2.44 (1.19, 5.18)                                                     |
| A14                                 | CKD        | 322  | 48.8 (13.6)          | 249 (77.3)        | 2.0 (0.6)        | 2.75 (1.53, 4.34)                                                     |
| A15                                 | Diabetes   | 1137 | 58.8 (7.7)           | 363 (31.9)        | 139 (12.2)       | 3.03 (1.76, 5.40)                                                     |
| <b>B. RAS Blockade v CCB</b>        |            |      |                      |                   |                  |                                                                       |
| B1                                  | HTN        | 653  | 54.4 (10.9)          | 255 (39.1)        | 653 (100)        | 0.11 (0.04, 0.57)                                                     |
| B16                                 | Diabetes   | 392  | 59.0 (8.2)           | 130 (33.2)        | 63.0 (16.1)      | 0.15 (0.07, 0.84)                                                     |
| B17                                 | CKD        | 121  | 55.4 (10.9)          | 47.0 (38.8)       | 0.0 (0.0)        | 1.00 (0.42, 2.60)                                                     |
| B15                                 | Diabetes   | 1129 | 59.2 (7.5)           | 400 (35.4)        | 147 (13.0)       | 2.91 (1.68, 5.11)                                                     |
| <b>C. Intensive Blood Pressure</b>  |            |      |                      |                   |                  |                                                                       |
| C1                                  | HTN        | 1094 | 54.6 (10.7)          | 425 (38.8)        | 1094 (100)       | 0.12 (0.04, 0.58)                                                     |
| C16                                 | Diabetes   | 392  | 59.0 (8.2)           | 130 (33.2)        | 63.0 (16.1)      | 0.15 (0.07, 0.84)                                                     |
| C18                                 | CKD        | 584  | 52.2 (12.2)          | 228 (39.0)        | 53.0 (9.1)       | 0.20 (0.06, 1.12)                                                     |
| C19                                 | CKD        | 255  | 50.8 (12.8)          | 104 (40.8)        | 13.0 (5.1)       | 0.71 (0.17, 2.04)                                                     |
| C20                                 | CKD        | 330  | 54.2 (14.9)          | 82.0 (24.8)       | 0.0 (0.0)        | 2.39 (1.51, 3.66)                                                     |
| <b>D. Low protein diet</b>          |            |      |                      |                   |                  |                                                                       |
| D18                                 | CKD        | 584  | 52.2 (12.2)          | 228 (39.0)        | 53.0 (9.1)       | 0.20 (0.06, 1.12)                                                     |
| D19                                 | CKD        | 255  | 50.8 (12.8)          | 104 (40.8)        | 13.0 (5.1)       | 0.71 (0.17, 2.04)                                                     |
| <b>E. Immunosuppressive Therapy</b> |            |      |                      |                   |                  |                                                                       |
| E21                                 | IgA        | 233  | 41.9 (13.3)          | 54.0 (23.2)       | 2.0 (0.9)        | 1.80 (1.10, 3.31)                                                     |
| E22                                 | Lupus      | 228  | 34.6 (11.7)          | 200 (87.7)        | 20.0 (8.8)       | 3.14 (1.91, 6.20)                                                     |
| E23                                 | Membranous | 343  | 47.4 (11.9)          | 125 (36.5)        | 0.0 (0.0)        | 5.50 (4.00, 8.30)                                                     |

N, number; SD, standard deviation; RAS, renin-angiotensin system; HTN, hypertension; CKD, chronic kidney disease without specified cause; IgA, immunoglobulin A; CCB, calcium channel blocker; BP, blood pressure.

Note: Each study is referred by an alphanumeric code. Each letter refers to treatment comparisons, and each number refers to the individual studies. **A** is RAS (renin angiotensin system) Blockade vs. Control, **B** is RAS Blockade vs. CCB (calcium channel blocker), **C** is Intensive Blood Pressure **D** is Low protein diet, and **E** is Immunosuppressive therapy. For studies with multiple interventions, there will be multiple letter-number codes for that study. For example, AASK which had multiple interventions: RAS Blockage vs. placebo, RAS Blockade vs. CCB, and Blood pressure control. Its study number is 1, but it has three codes to indicate the specific treatment comparison: A1, B1 and C1.
