# Supplementary material
Source: PubMed Central journal article supplement (PMC4070618)
Supplement: NIHMS578304-supplement-05.pdf [file NIHMS578304-supplement-05.pdf]

**Table S4: Individual Association of Change in Urine Protein and Clinical Outcomes**

| Study              | Covariate unadjusted <sup>a</sup><br>Hazard Ratio<br>(95% CI) | Covariate adjusted <sup>b</sup><br>Hazard Ratio<br>(95% CI) |
|--------------------|---------------------------------------------------------------|-------------------------------------------------------------|
| 1                  | 0.74 (0.67, 0.81)                                             | 0.76 (0.69, 0.84)                                           |
| 2                  | 1.22 (0.83, 1.79)                                             | 1.21 (0.78, 1.88)                                           |
| 4                  | 0.77 (0.63, 0.94)                                             | 0.80 (0.66, 0.97)                                           |
| 5                  | 1.24 (0.83, 1.86)                                             | 1.39 (0.85, 2.27)                                           |
| 6                  | 0.66 (0.42, 1.06)                                             | 0.73 (0.43, 1.23)                                           |
| 7                  | 1.05 (0.68, 1.61)                                             | 0.95 (0.59, 1.52)                                           |
| 8                  | 0.84 (0.59, 1.21)                                             | 0.77 (0.52, 1.14)                                           |
| 10                 | 0.39 (0.24, 0.64)                                             | 0.35 (0.21, 0.60)                                           |
| 12                 | 0.59 (0.46, 0.74)                                             | 0.58 (0.46, 0.74)                                           |
| 13                 | 0.72 (0.65, 0.80)                                             | 0.71 (0.64, 0.79)                                           |
| 14                 | 0.80 (0.60, 1.06)                                             | 0.61 (0.44, 0.84)                                           |
| 15                 | 0.58 (0.52, 0.65)                                             | 0.62 (0.55, 0.69)                                           |
| 16                 | 0.97 (0.80, 1.18)                                             | 0.97 (0.79, 1.18)                                           |
| 17                 | 0.83 (0.59, 1.15)                                             | 0.67 (0.44, 1.04)                                           |
| 18                 | 0.85 (0.69, 1.05)                                             | 0.83 (0.67, 1.02)                                           |
| 19                 | 0.74 (0.61, 0.90)                                             | 0.76 (0.63, 0.92)                                           |
| 20                 | 0.84 (0.57, 1.25)                                             | 0.93 (0.61, 1.42)                                           |
| 21                 | 0.47 (0.30, 0.75)                                             | 0.36 (0.21, 0.61)                                           |
| 22                 | 0.87 (0.67, 1.14)                                             | 0.84 (0.63, 1.11)                                           |
| 23                 | 0.66 (0.49, 0.88)                                             | 0.90 (0.35, 2.34)                                           |
| Total <sup>c</sup> | 0.74 (0.67, 0.82)                                             | 0.74 (0.66, 0.82)                                           |

The clinical outcome includes ESRD, doubling of serum creatinine and death.

<sup>a</sup>Adjusted for treatment, baseline Urine Protein, baseline Urine Protein x follow up time

<sup>b</sup>Adjusted for Control for treatment: Baseline Urine Protein, Baseline Urine Protein x follow up time, Serum, creatinine, Age, Systolic Blood Pressure, and Sex. Urine protein was log transformed in statistical analyses.

<sup>c</sup>Shown is the overall pooled HR under a Bayesian mixed effects model and 95% Bayesian credible interval.
