# Supplementary material
Source: PubMed Central journal article supplement (PMC4070618)
Supplement: NIHMS578304-supplement-09.pdf [file NIHMS578304-supplement-09.pdf]

**Table S8: Treatment Effect on Change in Urine Protein and on Clinical Outcome (ESRD, Doubling and Death)**

| Study Number | Treatment effect on Proteinuria |                      |                                                             | R <sup>2</sup> | Treatment effect on Clinical Outcome |                |                   | Ratio of treatment effect on the Clinical endpoint vs. treatment effect on change in UP |
|--------------|---------------------------------|----------------------|-------------------------------------------------------------|----------------|--------------------------------------|----------------|-------------------|-----------------------------------------------------------------------------------------|
|              | GMR in UP in intervention       | GMR in UP in control | GMR comparing intervention to control (95% CI) <sup>a</sup> |                | Events Treatment                     | Events Control | HR (95% CI)       |                                                                                         |
| A1           | 0.77 (0.44, 1.42)               | 0.82 (0.45, 1.50)    | 0.95 (0.81, 1.11)                                           | 0.001          | 116                                  | 142            | 0.80 (0.63, 1.02) | 0.85 (0.63, 1.89)                                                                       |
| A2           | 0.70 (0.56, 1.00)               | 1.23 (0.94, 1.64)    | 0.57 (0.42, 0.76)                                           | 0.121          | 11                                   | 13             | 0.92 (0.41, 2.08) | 1.62 (0.62, 1.86)                                                                       |
| A3           | 0.73 (0.52, 1.00)               | 0.76 (0.60, 1.00)    | 0.95 (0.66, 1.38)                                           | 0.001          | 9                                    | 5              | 2.08 (0.70, 6.20) | 2.17 (1.00, 2.72)                                                                       |
| A4           | 0.74 (0.47, 1.00)               | 1.06 (0.71, 1.39)    | 0.70 (0.61, 0.80)                                           | 0.051          | 35                                   | 53             | 0.57 (0.37, 0.87) | 0.81 (0.52, 1.67)                                                                       |
| A5           | 0.53 (0.31, 0.96)               | 0.78 (0.57, 1.16)    | 0.68 (0.46, 1.00)                                           | 0.071          | 10                                   | 15             | 0.73 (0.33, 1.62) | 1.07 (0.43, 1.54)                                                                       |
| A6           | 0.53 (0.34, 1.00)               | 0.90 (0.62, 1.33)    | 0.59 (0.43, 0.81)                                           | 0.108          | 13                                   | 10             | 1.53 (0.67, 3.49) | 2.61 (1.07, 2.91)                                                                       |
| A7           | 0.68 (0.48, 0.96)               | 1.01 (0.74, 1.38)    | 0.67 (0.49, 0.91)                                           | 0.099          | 11                                   | 13             | 0.94 (0.42, 2.10) | 1.41 (0.58, 1.79)                                                                       |
| A8           | 0.76 (0.43, 1.17)               | 0.63 (0.42, 1.00)    | 1.19 (0.83, 1.72)                                           | 0.012          | 15                                   | 24             | 0.49 (0.26, 0.93) | 0.41 (0.20, 1.22)                                                                       |
| A9           | 0.64 (0.43, 1.02)               | 1.05 (0.81, 1.48)    | 0.61 (0.49, 0.76)                                           | 0.16           | 2                                    | 6              | 0.32 (0.07, 1.61) | 0.53 (1.00, 2.72)                                                                       |
| A10          | 0.70 (0.60, 0.91)               | 0.98 (0.86, 1.10)    | 0.71 (0.65, 0.78)                                           | 0.201          | 44                                   | 65             | 0.58 (0.39, 0.85) | 0.81 (0.56, 1.75)                                                                       |
| A11          | 0.80 (0.57, 1.20)               | 1.14 (0.93, 1.53)    | 0.71 (0.52, 0.95)                                           | 0.112          | 4                                    | 11             | 0.51 (0.16, 1.66) | 0.72 (1.00, 2.72)                                                                       |
| A12          | 0.68 (0.49, 1.11)               | 0.91 (0.59, 1.36)    | 0.74 (0.64, 0.87)                                           | 0.036          | 36                                   | 58             | 0.52 (0.34, 0.79) | 0.70 (0.46, 1.58)                                                                       |
| A13          | 0.75 (0.52, 1.05)               | 1.03 (0.75, 1.42)    | 0.73 (0.68, 0.77)                                           | 0.065          | 327                                  | 359            | 0.87 (0.75, 1.01) | 1.20 (1.02, 2.78)                                                                       |
| A14          | 0.70 (0.47, 1.06)               | 0.99 (0.78, 1.33)    | 0.71 (0.62, 0.81)                                           | 0.093          | 27                                   | 46             | 0.53 (0.33, 0.85) | 0.75 (0.46, 1.58)                                                                       |
| A15          | 0.71 (0.47, 1.05)               | 0.97 (0.69, 1.41)    | 0.73 (0.68, 0.79)                                           | 0.057          | 187                                  | 218            | 0.80 (0.66, 0.97) | 1.10 (0.91, 2.48)                                                                       |
| B1           | 0.77 (0.44, 1.42)               | 1.51 (0.78, 2.57)    | 0.51 (0.42, 0.62)                                           | 0.083          | 116                                  | 70             | 0.79 (0.59, 1.06) | 1.55 (1.11, 3.02)                                                                       |
| B16          | 1.01 (0.60, 1.77)               | 1.23 (0.73, 2.27)    | 0.82 (0.67, 1.01)                                           | 0.011          | 34                                   | 32             | 1.17 (0.72, 1.90) | 1.41 (0.82, 2.27)                                                                       |
| B17          | 1.16 (0.69, 1.59)               | 1.04 (0.66, 1.68)    | 1.12 (0.79, 1.58)                                           | 0.004          | 11                                   | 18             | 0.66 (0.31, 1.40) | 0.59 (0.26, 1.30)                                                                       |
| B15          | 0.71 (0.47, 1.05)               | 0.97 (0.68, 1.36)    | 0.73 (0.68, 0.79)                                           | 0.061          | 187                                  | 229            | 0.76 (0.63, 0.93) | 1.04 (0.85, 2.34)                                                                       |
| C1           | 0.77 (0.42, 1.43)               | 1.07 (0.61, 1.91)    | 0.72 (0.62, 0.83)                                           | 0              | 255                                  | 73             | 0.94 (0.76, 1.17) | 1.32 (0.68, 1.97)                                                                       |
| C16          | 0.97 (0.55, 1.71)               | 1.28 (0.76, 2.27)    | 0.76 (0.62, 0.93)                                           | 0.012          | 48                                   | 18             | 0.78 (0.48, 1.28) | 1.03 (0.62, 1.86)                                                                       |
| C18          | 0.85 (0.67, 1.20)               | 0.93 (0.67, 1.22)    | 0.92 (0.82, 1.03)                                           | 0.004          | 34                                   | 38             | 0.81 (0.55, 1.19) | 0.88 (0.59, 1.80)                                                                       |
| C19          | 0.84 (0.63, 1.23)               | 0.93 (0.64, 1.42)    | 0.90 (0.76, 1.08)                                           | 0.005          | 74                                   | 70             | 0.91 (0.66, 1.25) | 1.01 (0.73, 2.07)                                                                       |
| C20          | 0.82 (0.59, 1.24)               | 0.96 (0.67, 1.41)    | 0.89 (0.76, 1.03)                                           | 0.014          | 44                                   | 42             | 0.97 (0.63, 1.48) | 1.09 (0.69, 2.00)                                                                       |
| D18          | 0.85 (0.67, 1.15)               | 0.96 (0.70, 1.26)    | 0.87 (0.78, 0.97)                                           | 0.011          | 27                                   | 45             | 0.71 (0.48, 1.06) | 0.82 (0.54, 1.72)                                                                       |
| D19          | 0.83 (0.64, 1.15)               | 0.95 (0.68, 1.27)    | 0.85 (0.72, 1.01)                                           | 0.013          | 67                                   | 77             | 0.90 (0.66, 1.24) | 1.06 (0.75, 2.12)                                                                       |

**Supplemental Table 8: Treatment Effect on Change in Urine Protein and on Clinical Outcome (ESRD, Doubling and Death) (continued)**

|                |                   |                   |                   |       |     |      |                   |                   |
|----------------|-------------------|-------------------|-------------------|-------|-----|------|-------------------|-------------------|
| E21            | 0.82 (0.51, 1.28) | 0.79 (0.53, 1.23) | 1.04 (0.85, 1.27) | 0.001 | 17  | 29   | 0.48 (0.26, 0.87) | 0.46 (0.25, 1.28) |
| E22            | 0.42 (0.22, 0.86) | 0.49 (0.27, 0.91) | 0.88 (0.66, 1.19) | 0.004 | 22  | 24   | 1.00 (0.55, 1.83) | 1.14 (0.59, 1.81) |
| E23            | 0.30 (0.13, 0.80) | 0.50 (0.28, 1.05) | 0.61 (0.48, 0.79) | 0.043 | 13  | 28   | 0.41 (0.21, 0.80) | 0.68 (0.35, 1.42) |
| A <sup>b</sup> | 0.72 (0.49, 1.05) | 0.96 (0.69, 1.38) | 0.73 (0.67, 0.81) |       | 847 | 1038 | 0.76 (0.67, 0.85) | 0.96 (0.81-1.13)  |
| B <sup>b</sup> | 0.79 (0.48, 1.27) | 1.10 (0.69, 1.67) | 0.73 (0.61, 0.87) |       | 348 | 349  | 0.79 (0.66, 0.92) | 1.17 (0.89-1.52)  |
| C <sup>b</sup> | 0.83 (0.54, 1.33) | 1.04 (0.67, 1.63) | 0.83 (0.72, 0.96) |       | 455 | 241  | 0.90 (0.76, 1.05) | 1.08 (0.86-1.38)  |
| D <sup>b</sup> | 0.82 (0.63, 1.15) | 0.95 (0.68, 1.33) | 0.86 (0.69, 1.09) |       | 94  | 122  | 0.82 (0.63, 1.07) | 0.95 (0.66-1.36)  |
| E <sup>b</sup> | 0.44 (0.23, 1.00) | 0.56 (0.32, 1.13) | 0.83 (0.66, 1.03) |       | 52  | 81   | 0.60 (0.41, 0.84) | 0.69 (0.46-1.08)  |

<sup>a</sup> GMR, geometric mean ratio between the early follow-up and baseline geometric mean UP, urine protein levels; CI, confidence interval; HR, hazard ratio.

<sup>b</sup> Shown are pooled estimates under Bayesian mixed models and 95% posterior credible intervals.

Urine protein was log transformed in statistical analyses.

**A** is RAS (renin angiotensin system) Blockade vs. Control, **B** is RAS Blockade vs. CCB (calcium channel blocker), **C** is Intensive Blood Pressure **D** is Low protein diet, and **E** is Immunosuppressive therapy.

Each study is referred by an alphanumeric code. Each letter refers to treatment comparisons, and each number refers to the individual studies. **A** is RAS (renin angiotensin system) Blockade vs. Control, **B** is RAS Blockade vs. CCB (calcium channel blocker), **C** is Intensive Blood Pressure **D** is Low protein diet, and **E** is Immunosuppressive therapy. For studies with multiple interventions, there will be multiple letter-number codes for that study. For example, AASK which had multiple interventions: RAS Blockage vs. placebo, RAS Blockade vs. CCB, and Blood pressure control. Its study number is 1, but it has three codes to indicate the specific treatment comparison: A1, B1 and C1.
